# Supplementary material for: Protein Disulfide Isomerase (PDI1-1) differential expression and modification in Mexican malting barley cultivars
Source: PubMed Central journal article supplement (PMC6235301; doi:10.1371/journal.pone.0206470), 2018-11-14
Supplement: pone.0206470.s001.pdf [file pone.0206470.s001.pdf]

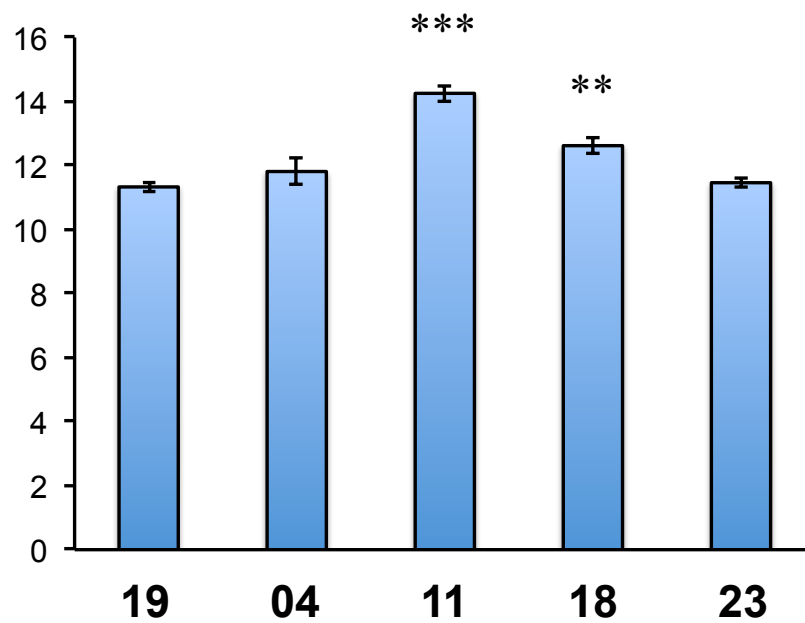

**S1 Fig. Dry seed protein content in five Mexican malting barley cultivars.** The total protein content was measured by the Kjeldahl method. Four independent seed samples were used for each cultivar. Significant differences were found for cultivars 23 (\*\*\*) and 18 (\*\*).
