# Supplementary material for: Protein Disulfide Isomerase (PDI1-1) differential expression and modification in Mexican malting barley cultivars
Source: PubMed Central journal article supplement (PMC6235301; doi:10.1371/journal.pone.0206470), 2018-11-14
Supplement: pone.0206470.s002.pdf [file pone.0206470.s002.pdf]

### Barley PDI1-1 protein sequence

MAISKVWISLLLLALAVVLSAPAARAEEAAAAEE  
 AAAPAVLTLHADNFDDAIGQHPFILVEFYAPW  
 CGHCKSLAPEYEKAAQLLSKHDPAILVAKVDAN  
 DEKNKPLAGKYEVQGFPTLKI FRNGGKSIQEYK  
 GPRAEAGIVEYLLKQVGPASKEIKAPEDATYLE  
 DGKIHIVGVFTEFSGPEFTNFLEVAEKLSYYD  
 FGHTVHANHLPRGDAVERPVVRLFKPFDELVV  
 DSKDFDVSALEKFDASSTPKVVI FDKNPDNHP  
 YLLKFFQSNAPKAMFLNFSTGPFESFKSAYYG  
 AVEEFSGKDVKFLIGDISSQGAFAQYFGLKVDQ  
 APLILIQDGSKKFLKEHVEAGQIVAWLKDYFD  
 GKLTPEFKSEPI PEANNEPVKVVVADNVHDVVF  
 KSGKNVLIIEFYAPWCGHCKKLAPILDEAAATLQ  
 SEEDVVIKMDATENDVPGEFDVQGYPTLYFVT  
 PSGKKVSYEGGRTADEIVDYIRKNKETAGQAAA  
 ATEKAAEPAATEPLKDEL

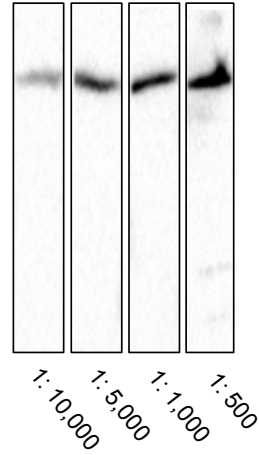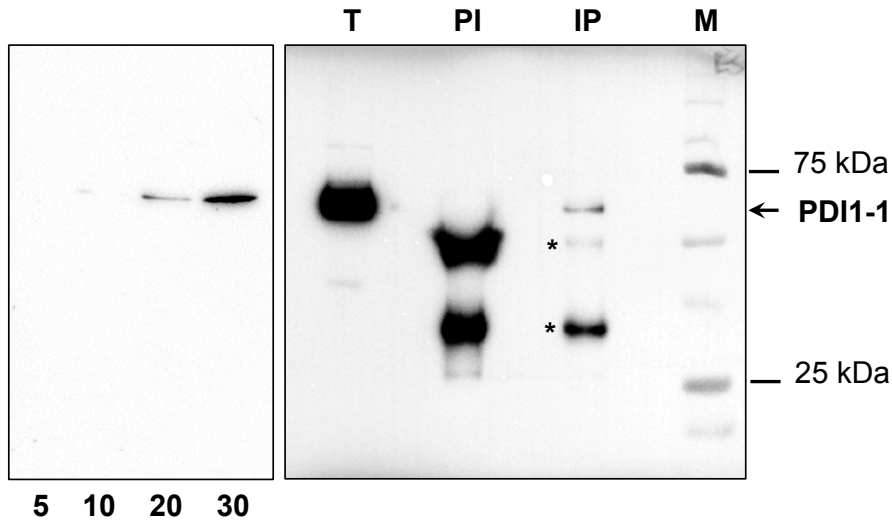

**S2 Fig. Description and validation of the PDI1-1 antiserum.** The carboxi-terminus peptide shown in red was used to generate polyclonal antiserum against PDI1-1 in rabbit (GenScript, USA Inc.). The antiserum was purified against the peptide as recommended by the provider. Different dilutions of the purified antiserum were used in western blot (right upper corner) with total protein extracts from barley seeds (30 µg) and a single band was detected at the expected molecular weight for PDI1-1 (55 kDa). Different amounts (µg) of total protein were tested for the 1:5000 dilution (lower left corner). Immunoprecipitation (IP) with the antiserum showed the same PDI1-1 band, detected in total extracts (T), whereas the pre-immune serum (PI) did not detect the band. High and low molecular weight IgGs were detected in both immunoprecipitate reactions (\*). In addition, the band corresponding to PDI1-1 in the IP was identified by mass spectrometry.
