# Supplementary material for: Protein Disulfide Isomerase (PDI1-1) differential expression and modification in Mexican malting barley cultivars
Source: PubMed Central journal article supplement (PMC6235301; doi:10.1371/journal.pone.0206470), 2018-11-14
Supplement: pone.0206470.s003.pdf [file pone.0206470.s003.pdf]

| Peptide (µg) | Antibody dilution |         |         |         |          |          |          |
|--------------|-------------------|---------|---------|---------|----------|----------|----------|
|              | 1:1,000           | 1:2,000 | 1:4,000 | 1:8,000 | 1:16,000 | 1:32,000 | 1:64,000 |
| 0            | 0.057             | 0.052   | 0.047   | 0.057   | 0.032    | 0.045    | 0.051    |
| 0.25         | 0.791             | 0.43    | 0.266   | 0.185   | 0.141    | 0.126    | 0.1      |
| 0.5          | 1.005             | 0.603   | 0.328   | 0.214   | 0.147    | 0.119    | 0.11     |
| 1            | 1.205             | 0.822   | 0.543   | 0.282   | 0.194    | 0.134    | 0.118    |

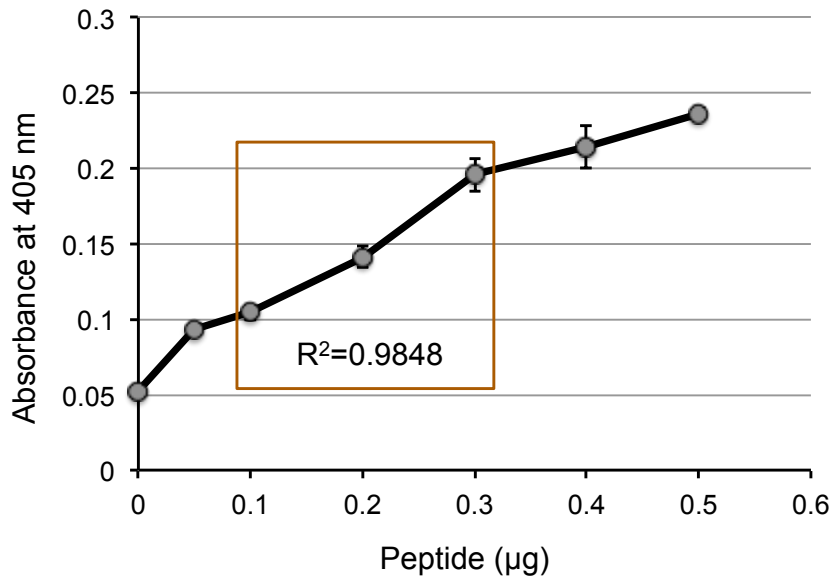

**S3 Fig. ELISA assay calibration for PDI1-1.** Different antiserum dilutions and amount of the PDI1-1 immunogenic peptide were used for ELISA calibration reactions in triplicate. The table shows average absorbance for each condition. The dilution 1:4,000 (highlighted) was used for further analyses. The graph below shows a calibration curve of different antigen amounts for the selected dilution, where the range between 0.1 and 0.3 µg showed strong correlation with the absorbance at 405 nm. A calibration curve using antigen amounts within this range was included in each ELISA test performed in the study to calculate the relative PDI1-1 amount in total protein extracts as described in Methods.
