# Supplementary material for: Protein Disulfide Isomerase (PDI1-1) differential expression and modification in Mexican malting barley cultivars
Source: PubMed Central journal article supplement (PMC6235301; doi:10.1371/journal.pone.0206470), 2018-11-14
Supplement: pone.0206470.s004.pdf [file pone.0206470.s004.pdf]

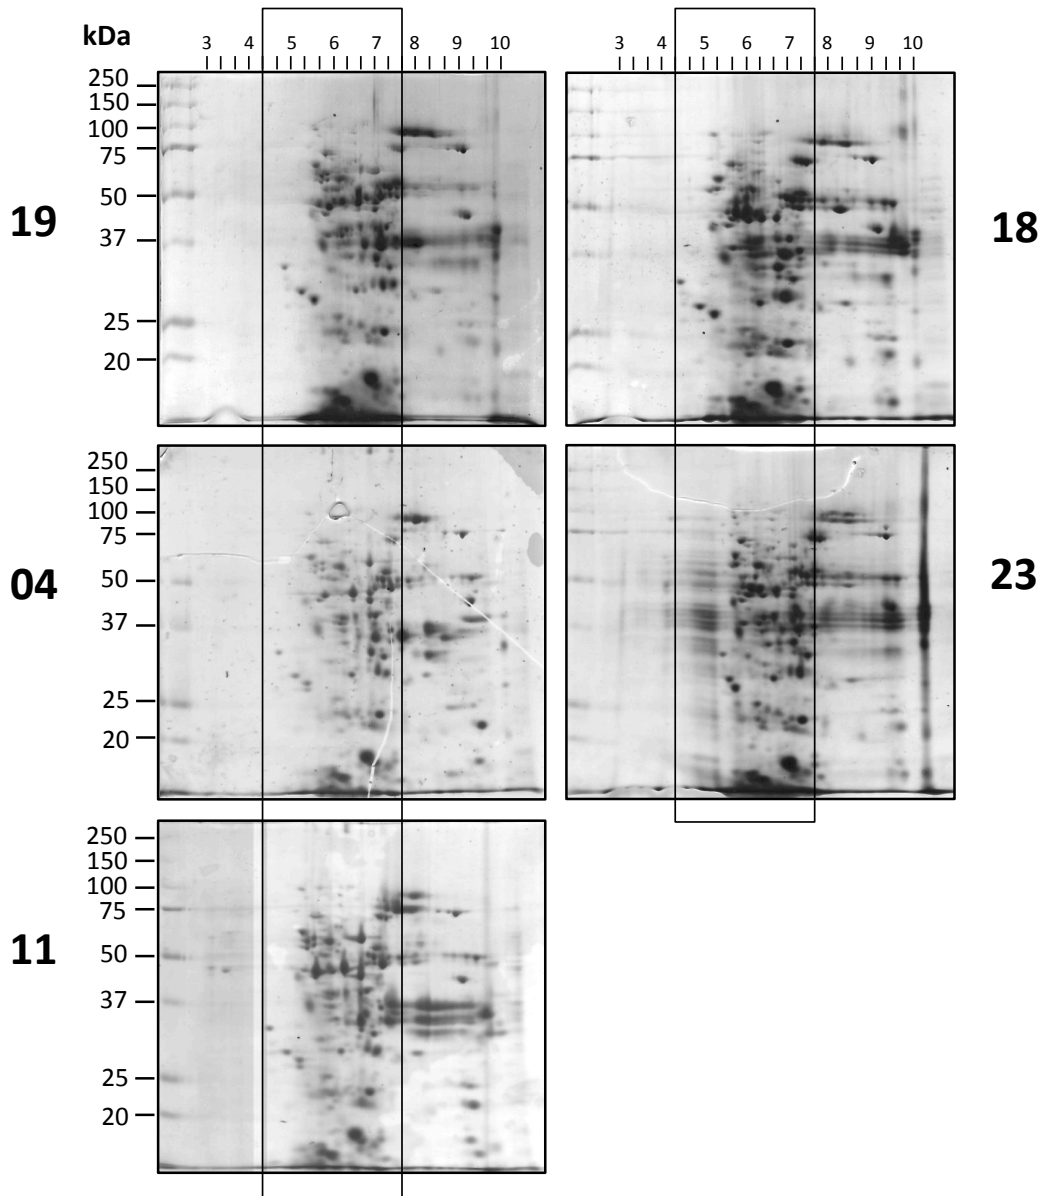

**S4 Fig. Protein profiles in the mature seeds from five Mexican barley cultivars (19, 04, 11, 18 and 23) resolved by 2D-PAGE in the pI 3-10 range.**
