# Supplementary material for: Protein Disulfide Isomerase (PDI1-1) differential expression and modification in Mexican malting barley cultivars
Source: PubMed Central journal article supplement (PMC6235301; doi:10.1371/journal.pone.0206470), 2018-11-14
Supplement: pone.0206470.s006.pdf [file pone.0206470.s006.pdf]

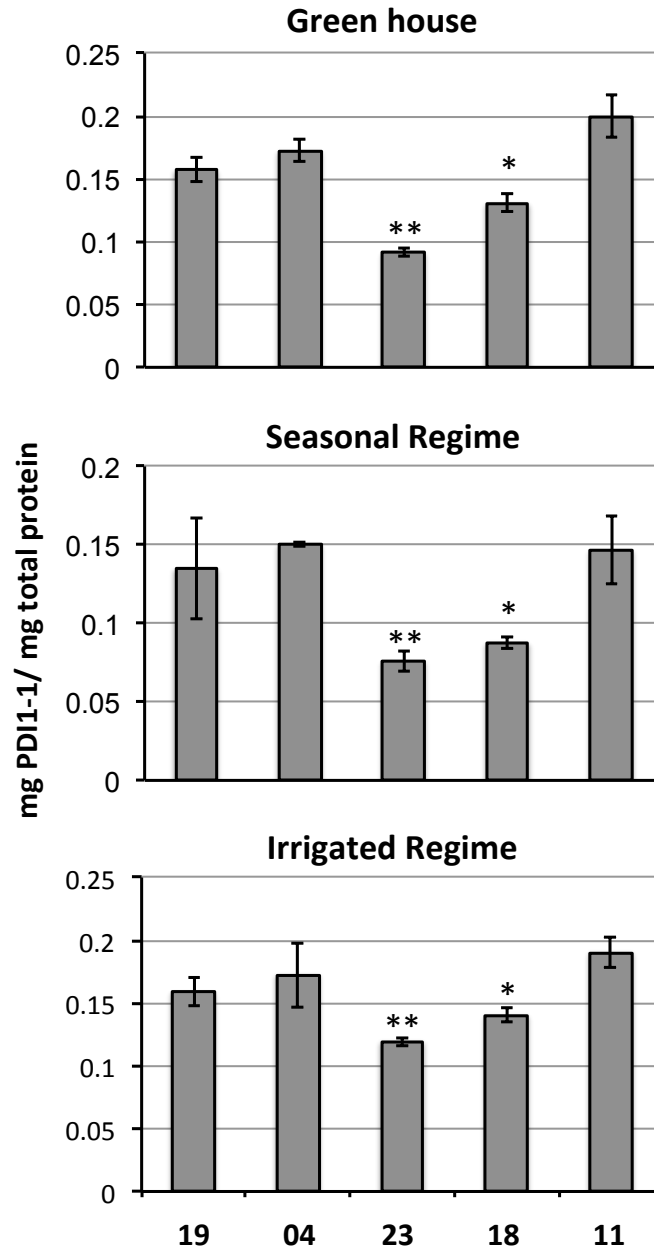

**S6 Fig. PDI1-1 levels in the mature seeds of five Mexican barley cultivars (19, 04, 23, 18 and 11) under different growth conditions.** Proteins were extracted from whole seeds, PDI1-1 quantified by ELISA and normalized to total protein in three independent protein extractions for each growth condition (green house; seasonal regime in the field; irrigated regime in the field). Significant differences were found for cultivars 23 (\*\*;  $p < 0.01$ ) and 18 (\*;  $p < 0.05$ ).
